# Supplementary material for: Complexes of (η6-benzene)ruthenium(ii) with 1,4-bis(phenylthio/seleno-methyl)-1,2,3-triazoles: synthesis, structure and applications in catalytic activation of oxidation and transfer hydrogenation
Source: Royal Society of Chemistry journal article supplement (doi:10.1039/c5dt02926k), 2015-01-01
Supplement: c5dt02926k1.pdf [file c5dt02926k1.pdf]

**ESI for**

**Complexes of ( $\eta^6$ -benzene)ruthenium(II) with 1,4-bis(phenylthio/seleno-methyl)-1,2,3-triazoles: synthesis, structure and applications in catalytic activation of oxidation and transfer hydrogenation**

Fariha Saleem, Gyandshwar Kumar Rao, Satyendra Kumar, Mahabir Pratap Singh and Ajai Kumar Singh\*

Department of Chemistry, Indian Institute of Technology, Delhi, New Delhi 110016, India

**Table S1** Crystal data and structural refinements for Complexes 1– 4

| Compounds                                        | <b>1</b>                                                                                                                                                 | <b>2</b>                                                                                                                                                         | <b>3</b>                                                                                                                                                    | <b>4</b>                                                                                                                                                   |
|--------------------------------------------------|----------------------------------------------------------------------------------------------------------------------------------------------------------|------------------------------------------------------------------------------------------------------------------------------------------------------------------|-------------------------------------------------------------------------------------------------------------------------------------------------------------|------------------------------------------------------------------------------------------------------------------------------------------------------------|
| Empirical formula                                | C22 H21 Cl N3<br>Ru S2, F6 P                                                                                                                             | C22 H21 Cl N3<br>Ru S Se, F6 P                                                                                                                                   | C22 H21 Cl N3<br>Ru S Se, F6 P                                                                                                                              | C22 H21 Cl N3<br>Ru Se2, F6 P                                                                                                                              |
| Formula wt.                                      | 673.03                                                                                                                                                   | 719.94                                                                                                                                                           | 719.94                                                                                                                                                      | 766.83                                                                                                                                                     |
| Crystal size [mm]                                | 0.29×0.22×0.20                                                                                                                                           | 0.41×0.27×0.17                                                                                                                                                   | 0.33×0.29×0.21                                                                                                                                              | 0.33×0.31×0.29                                                                                                                                             |
| Crystal system                                   | Monoclinic                                                                                                                                               | Monoclinic                                                                                                                                                       | Orthorhombic                                                                                                                                                | Orthorhombic                                                                                                                                               |
| Space group                                      | $P2_1/c$                                                                                                                                                 | $P2_1/c$                                                                                                                                                         | $P2_12_12_1$                                                                                                                                                | $P2_12_12_1$                                                                                                                                               |
| Unit Cell dimension                              | $a = 10.729(3)\text{Å}$<br>$b = 10.019(3)\text{Å}$<br>$c = 24.414(7)\text{Å}$<br>$\alpha = 90.00^\circ$<br>$\beta = 96.518(5)$<br>$\gamma = 90.00^\circ$ | $a = 10.753(19)\text{Å}$<br>$b = 10.110(18)\text{Å}$<br>$c = 24.622(4)\text{Å}$<br>$\alpha = 90.00^\circ$<br>$\beta = 97.496(3)^\circ$<br>$\gamma = 90.00^\circ$ | $a = 9.3249(8)\text{Å}$<br>$b = 10.7293(9)\text{Å}$<br>$c = 24.776(2)\text{Å}$<br>$\alpha = 90.00^\circ$<br>$\beta = 90.00^\circ$<br>$\gamma = 90.00^\circ$ | $a = 9.591(5)\text{Å}$<br>$b = 10.922(6)\text{Å}$<br>$c = 25.180(14)\text{Å}$<br>$\alpha = 90.00^\circ$<br>$\beta = 90.00^\circ$<br>$\gamma = 90.00^\circ$ |
| Volume [ $\text{Å}^3$ ]                          | 2607.5(13)                                                                                                                                               | 2651.3(8)                                                                                                                                                        | 2478.8(4)                                                                                                                                                   | 2638(2)                                                                                                                                                    |
| Z                                                | 4                                                                                                                                                        | 4                                                                                                                                                                | 4                                                                                                                                                           | 4                                                                                                                                                          |
| $\rho_{\text{calcd}}$ [ $\text{g}/\text{cm}^3$ ] | 1.714                                                                                                                                                    | 1.804                                                                                                                                                            | 1.929                                                                                                                                                       | 1.931                                                                                                                                                      |
| $\mu(\text{MoK}\alpha)$ [ $\text{mm}^{-1}$ ]     | 0.986                                                                                                                                                    | 2.264                                                                                                                                                            | 2.421                                                                                                                                                       | 3.576                                                                                                                                                      |
| $F(000)$                                         | 1344.0                                                                                                                                                   | 1416                                                                                                                                                             | 1416.0                                                                                                                                                      | 1488.0                                                                                                                                                     |
| $\theta$ range [ $^\circ$ ]                      | 1.68–25.00                                                                                                                                               | 1.91–25.00                                                                                                                                                       | 1.64–25.00                                                                                                                                                  | 1.62–25.00                                                                                                                                                 |
| Index ranges                                     | $-12 \leq h \leq 12$<br>$-11 \leq k \leq 11$<br>$-29 \leq l \leq 29$                                                                                     | $-12 \leq h \leq 12$<br>$-11 \leq k \leq 11$<br>$-29 \leq l \leq 21$                                                                                             | $-11 \leq h \leq 11$<br>$-12 \leq k \leq 12$<br>$-29 \leq l \leq 29$                                                                                        | $-11 \leq h \leq 11$<br>$-12 \leq k \leq 12$<br>$-29 \leq l \leq 29$                                                                                       |
| Reflections collected                            | 22902                                                                                                                                                    | 24116                                                                                                                                                            | 22815                                                                                                                                                       | 19589                                                                                                                                                      |
| Independent reflections( $R_{\text{int.}}$ )     | 4309 (0.1095)                                                                                                                                            | 4656 (0.0701)                                                                                                                                                    | 4341 (0.0379)                                                                                                                                               | 4609 (0.1329)                                                                                                                                              |
| Completeness to max. $\theta$ [%]                | 94.0                                                                                                                                                     | 99.7                                                                                                                                                             | 99.9                                                                                                                                                        | 98.9                                                                                                                                                       |
| Max./min. Transmission                           | 0.824 / 0.769                                                                                                                                            | 0.684/ 0.481                                                                                                                                                     | 0.604 / 0.451                                                                                                                                               | 0.358/ 0.317                                                                                                                                               |
| Data/restraints/ parameters                      | 4309 / 0 / 325                                                                                                                                           | 4656 / 0 / 325                                                                                                                                                   | 4341 / 0 / 325                                                                                                                                              | 4609 / 0 / 325                                                                                                                                             |
| Goodness-of-fit on $F^2$                         | 1.241                                                                                                                                                    | 1.180                                                                                                                                                            | 1.046                                                                                                                                                       | 1.099                                                                                                                                                      |
| Final R indices [ $I > 2\sigma(I)$ ]             | $R_1 = 0.0995$ ,<br>$wR_2 = 0.1646$                                                                                                                      | $R_1 = 0.0687$ ,<br>$wR_2 = 0.1498$                                                                                                                              | $R_1 = 0.0202$ ,<br>$wR_2 = 0.0524$                                                                                                                         | $R_1 = 0.0569$ ,<br>$wR_2 = 0.1293$                                                                                                                        |
| R indices (all data)                             | $R_1 = 0.1219$ ,<br>$wR_2 = 0.1736$                                                                                                                      | $R_1 = 0.0872$ ,<br>$wR_2 = 0.1572$                                                                                                                              | $R_1 = 0.0208$ ,<br>$wR_2 = 0.0527$                                                                                                                         | $R_1 = 0.0844$ ,<br>$wR_2 = 0.1432$                                                                                                                        |
| Largest diff. peak/hole[e. $\text{Å}^{-3}$ ]     | 0.617 / -1.565                                                                                                                                           | 1.581 / -0.707                                                                                                                                                   | 0.745 / -0.311                                                                                                                                              | 1.057 / -1.103                                                                                                                                             |
| CCDC No.                                         | 1401444                                                                                                                                                  | 1401445                                                                                                                                                          | 1401446                                                                                                                                                     | 1401447                                                                                                                                                    |

**Table S2** Bond Lengths and Bond Angles of **1–4**

| Compounds | Bond length [Å]            | Bond angle [°]             |
|-----------|----------------------------|----------------------------|
| <b>1</b>  | C(6)—S(1) 1.777(11)        | N(1)—Ru(1)—C(17) 91.3(5)   |
|           | C(7)—S(1) 1.832(11)        | C(17)—Ru(1)—C(21) 67.2(6)  |
|           | C(8)—N(1) 1.359(13)        | C(17)—Ru(1)—C(22) 37.6(6)  |
|           | C(9)—N(3) 1.333(15)        | N(1)—Ru(1)—C(18) 104.1(6)  |
|           | C(10)—N(3) 1.449(14)       | C(17)—Ru(1)—C(18) 37.1(6)  |
|           | C(10)—S(2) 1.784(13)       | C(17)—Ru(1)—C(19) 67.4(7)  |
|           | C(11)—S(2) 1.786(13)       | N(1)—Ru(1)—S(1) 80.4(3)    |
|           | C(17)—Ru(1) 2.139(14)      | C(17)—Ru(1)—S(1) 135.4(6)  |
|           | C(18)—Ru(1) 2.174(15)      | C(21)—Ru(1)—S(1) 92.1(4)   |
|           | C(19)—Ru(1) 2.187(13)      | C(22)—Ru(1)—S(1) 103.5(5)  |
|           | C(20)—Ru(1) 2.179(13)      | C(18)—Ru(1)—S(1) 170.3(5)  |
|           | C(21)—Ru(1) 2.151(12)      | C(20)—Ru(1)—S(1) 108.1(5)  |
|           | C(22)—Ru(1) 2.173(13)      | C(19)—Ru(1)—S(1) 141.2(6)  |
|           | Cl(1)—Ru(1) 2.394(3)       | N(1)—Ru(1)—Cl(1) 87.2(2)   |
|           | N(1)—N(2) 1.313(12)        | C(17)—Ru(1)—Cl(1) 142.6(6) |
|           | N(1)—Ru(1) 2.091(9)        | C(21)—Ru(1)—Cl(1) 130.1(6) |
|           | N(2)—N(3) 1.318(12)        | C(22)—Ru(1)—Cl(1) 165.6(4) |
|           | Ru(1)—S(1) 2.388(2)        | C(18)—Ru(1)—Cl(1) 107.5(6) |
|           |                            | C(20)—Ru(1)—Cl(1) 99.6(5)  |
|           |                            | C(19)—Ru(1)—Cl(1) 88.7(4)  |
|           | S(1)—Ru(1)—Cl(1) 81.09(10) |                            |
|           | C(6)—S(1)—C(7) 104.8(5)    |                            |
|           | C(6)—S(1)—Ru(1) 108.3(4)   |                            |
|           | C(7)—S(1)—Ru(1) 99.9(4)    |                            |
|           | C(10)—S(2)—C(11) 99.5(6)   |                            |
| <b>2</b>  | C(6)—S(1) 1.783(7)         | N(1)—Ru(1)—C(20) 140.1(4)  |
|           | C(7)—S(1) 1.834(7)         | N(1)—Ru(1)—C(22) 91.4(3)   |
|           | C(8)—N(1) 1.350(9)         | N(1)—Ru(1)—C(17) 104.8(4)  |
|           | C(9)—N(3) 1.319(10)        | N(1)—Ru(1)—C(21) 106.5(4)  |
|           | C(10)—N(3) 1.450(9)        | N(1)—Ru(1)—C(19) 169.9(3)  |
|           | C(10)—Se(1) 1.970(8)       | N(1)—Ru(1)—C(18) 137.7(4)  |
|           | C(11)—Se(1) 1.909(9)       | N(1)—Ru(1)—S(1) 80.55(16)  |
|           | C(17)—Ru(1) 2.166(9)       | C(17)—Ru(1)—C(21) 67.3(4)  |
|           | C(18)—Ru(1) 2.194(9)       | C(20)—Ru(1)—S(1) 92.4(3)   |
|           | C(19)—Ru(1) 2.191(9)       | C(22)—Ru(1)—S(1) 135.4(4)  |
|           | C(20)—Ru(1) 2.134(9)       | C(17)—Ru(1)—S(1) 170.5(3)  |
|           | C(21)—Ru(1) 2.173(9)       | C(21)—Ru(1)—S(1) 103.8(3)  |
|           | C(22)—Ru(1) 2.156(8)       | C(19)—Ru(1)—S(1) 107.4(3)  |
|           | Cl(1)—Ru(1) 2.399(2)       | C(18)—Ru(1)—S(1) 140.3(4)  |
|           | N(1)—N(2) 1.304(8)         | N(1)—Ru(1)—Cl(1) 87.14(16) |
|           | N(1)—Ru(1) 2.104(6)        | C(20)—Ru(1)—Cl(1) 130.7(4) |
|           | N(2)—N(3) 1.350(8)         | C(22)—Ru(1)—Cl(1) 143.0(4) |
|           | Ru(1)—S(1) 2.3902(19)      | C(17)—Ru(1)—Cl(1) 107.0(4) |
|           |                            | C(21)—Ru(1)—Cl(1) 166.1(3) |
|           |                            | C(19)—Ru(1)—Cl(1) 100.1(3) |
|           | C(18)—Ru(1)—Cl(1) 89.5(3)  |                            |
|           | S(1)—Ru(1)—Cl(1) 80.85(7)  |                            |

|          |                                                                                                                                                                                                                                                                                                                                                                                                                                  |                                                                                                                                                                                                                                                                                                                                                                                                                                                                                                                                                                                                                                                                                                                                                                                                                                                                                                                                                                                                                                      |
|----------|----------------------------------------------------------------------------------------------------------------------------------------------------------------------------------------------------------------------------------------------------------------------------------------------------------------------------------------------------------------------------------------------------------------------------------|--------------------------------------------------------------------------------------------------------------------------------------------------------------------------------------------------------------------------------------------------------------------------------------------------------------------------------------------------------------------------------------------------------------------------------------------------------------------------------------------------------------------------------------------------------------------------------------------------------------------------------------------------------------------------------------------------------------------------------------------------------------------------------------------------------------------------------------------------------------------------------------------------------------------------------------------------------------------------------------------------------------------------------------|
|          |                                                                                                                                                                                                                                                                                                                                                                                                                                  | C(6)—S(1)—C(7) 103.9(3)<br>C(11)—Se(1)—C(10) 95.9(3)                                                                                                                                                                                                                                                                                                                                                                                                                                                                                                                                                                                                                                                                                                                                                                                                                                                                                                                                                                                 |
| <b>3</b> | Ru(1)—N(1) 2.092(2)<br>Ru(1)—C(22) 2.168(3)<br>Ru(1)—C(21) 2.169(3)<br>Ru(1)—C(20) 2.181(3)<br>Ru(1)—C(19) 2.184(3)<br>Ru(1)—C(17) 2.186(3)<br>Ru(1)—C(18) 2.196(3)<br>Ru(1)—Cl(1) 2.4032(7)<br>Ru(1)—Se(1) 2.5007(4)<br>Se(1)—C(6) 1.939(3)<br>Se(1)—C(7) 1.969(3)<br>N(1)—N(2) 1.323(3)<br>S(1)—C(11) 1.789(3)<br>S(1)—C(10) 1.812(3)<br>N(1)—C(8) 1.360(4)<br>N(3)—C(9) 1.349(4)<br>N(3)—C(10) 1.463(4)<br>N(2)—N(3) 1.333(3) | N(1)—Ru(1)—C(22) 90.26(10)<br>N(1)—Ru(1)—C(21) 110.67(10)<br>N(1)—Ru(1)—C(20) 147.48(11)<br>N(1)—Ru(1)—C(19) 165.43(11)<br>N(1)—Ru(1)—C(17) 97.99(10)<br>C(19)—Ru(1)—C(17) 67.92(12)<br>N(1)—Ru(1)—C(18) 127.71(11)<br>C(17)—Ru(1)—C(18) 37.12(13)<br>N(1)—Ru(1)—Cl(1) 88.93(6)<br>C(22)—Ru(1)—Cl(1) 151.06(10)<br>C(21)—Ru(1)—Cl(1) 160.12(9)<br>C(20)—Ru(1)—Cl(1) 121.86(9)<br>C(19)—Ru(1)—Cl(1) 93.45(9)<br>C(17)—Ru(1)—Cl(1) 113.85(9)<br>C(18)—Ru(1)—Cl(1) 90.14(9)<br>N(1)—Ru(1)—Se(1) 81.03(6)<br>C(22)—Ru(1)—Se(1) 130.18(10)<br>C(21)—Ru(1)—Se(1) 100.97(8)<br>C(20)—Ru(1)—Se(1) 94.42(9)<br>C(19)—Ru(1)—Se(1) 113.53(9)<br>C(17)—Ru(1)—Se(1) 167.96(9)<br>C(18)—Ru(1)—Se(1) 149.14(9)<br>C(11)—Ru(1)—Se(1) 78.18(2)<br>C(6)—Se(1)—C(7) 101.60(13)<br>C(6)—Se(1)—Ru(1) 108.15(8)<br>C(7)—Se(1)—Ru(1) 95.29(8)<br>N(2)—N(1)—C(8) 110.9(2)<br>N(2)—N(1)—Ru(1) 124.40(17)<br>C(8)—N(1)—Ru(1) 124.30(18)<br>C(11)—S(1)—C(10) 100.03(14)<br>C(12)—C(11)—S(1) 119.8(2)<br>C(16)—C(11)—S(1) 120.2(2)<br>C(8)—C(7)—Se(1) 110.02(19) |
| <b>4</b> | C(6)—Se(1) 1.946(10)<br>C(7)—Se(1) 1.986(10)<br>C(8)—N(1) 1.404(12)<br>C(9)—N(3) 1.355(14)<br>C(10)—N(3) 1.456(14)<br>C(10)—Se(2) 1.970(11)<br>C(11)—Se(2) 1.952(10)<br>C(17)—Ru(1) 2.175(11)<br>C(18)—Ru(1) 2.184(11)<br>C(19)—Ru(1) 2.196(12)<br>C(20)—Ru(1) 2.188(11)<br>C(21)—Ru(1) 2.204(10)<br>C(22)—Ru(1) 2.193(9)<br>Cl(1)—Ru(1) 2.419(3)                                                                                | N(1)—C(8)—C(9) 105.1(9)<br>N(1)—C(8)—C(7) 121.2(9)<br>N(3)—C(9)—C(8) 105.5(8)<br>N(3)—C(10)—Se(2) 112.2(8)<br>N(2)—N(1)—Ru(1) 126.1(6)<br>C(8)—N(1)—Ru(1) 123.1(7)<br>N(1)—Ru(1)—C(17) 90.9(4)<br>N(1)—Ru(1)—C(18) 99.0(5)<br>C(17)—Ru(1)—C(18) 38.0(5)<br>N(1)—Ru(1)—C(20) 166.0(5)<br>C(17)—Ru(1)—C(20) 79.3(5)<br>C(18)—Ru(1)—C(20) 67.2(6)<br>N(1)—Ru(1)—C(22) 110.6(4)<br>N(1)—Ru(1)—C(19) 129.5(5)                                                                                                                                                                                                                                                                                                                                                                                                                                                                                                                                                                                                                             |

|                        |                            |
|------------------------|----------------------------|
| N(3)—N(2) 1.335(11)    | N(1)—Ru(1)—C21 147.3(5)    |
| N(2)—N(1) 1.316(11)    | C(17)—Ru(1)—C21 67.2(5)    |
| N(1)—Ru(1) 2.096(7)    | C(18)—Ru(1)—C(21) 78.8(5)  |
| Ru(1)—Se(1) 2.5262(19) | N(1)—Ru(1)—Cl(1) 88.2(2)   |
|                        | C(17)—Ru(1)—Cl(1) 150.4(4) |
|                        | C(18)—Ru(1)—Cl(1) 113.1(4) |
|                        | C(20)—Ru(1)—Cl(1) 95.4(4)  |
|                        | C(22)—Ru(1)—Cl(1) 161.1(3) |
|                        | C(19)—Ru(1)—Cl(1) 90.0(4)  |
|                        | C(21)—Ru(1)—Cl(1) 123.0(4) |
|                        | N(1)—Ru(1)—Se(1) 81.5(3)   |
|                        | C(17)—Ru(1)—Se(1) 130.7(4) |
|                        | C(18)—Ru(1)—Se(1) 168.4(4) |
|                        | C(20)—Ru(1)—Se(1) 112.5(4) |
|                        | C(22)—Ru(1)—Se(1) 101.8(3) |
|                        | C(19)—Ru(1)—Se(1) 146.9(5) |
|                        | C(21)—Ru(1)—Se(1) 94.5(4)  |
|                        | Cl(1)—Ru(1)—Se(1) 78.40(9) |
|                        | C(6)—Se(1)—C(7) 101.7(4)   |
|                        | C(6)—Se(1)—Ru(1) 108.0(3)  |
|                        | C(7)—Se(1)—Ru(1) 95.1(3)   |
|                        | C(11)—Se(2)—C(10) 96.9(5)  |

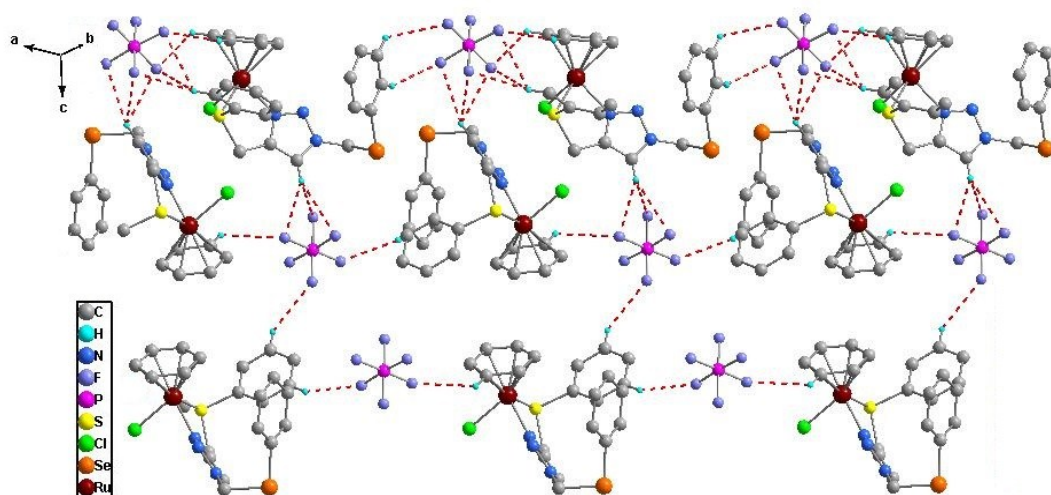

**Figure S1.** Non-covalent C–H···F interactions in **2**

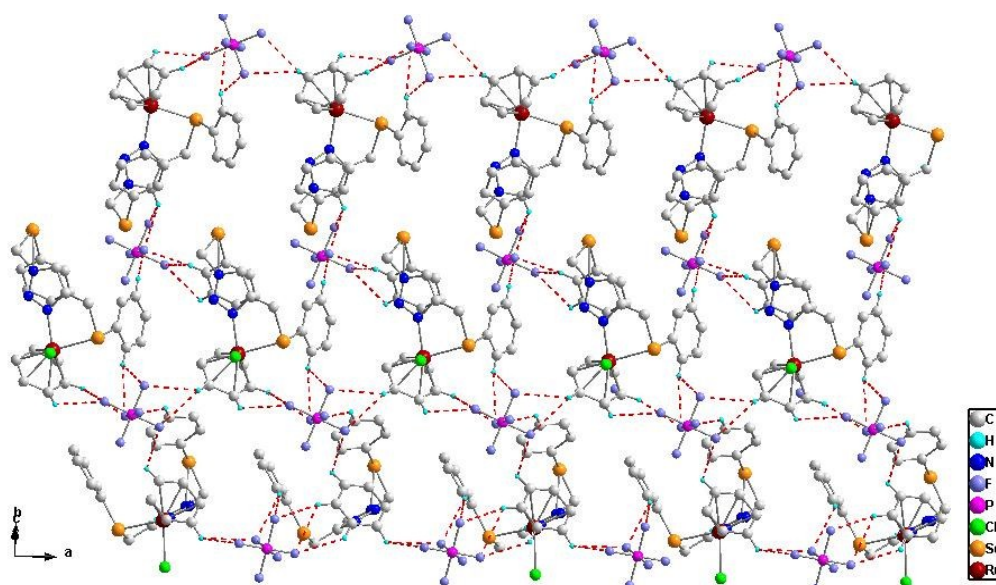

**Figure S2.** Non-covalent C–H···F interactions in **4**

**Table S3** Non-covalent interactions C–H···F distances[Å] of **1–4**

| <b>1</b>             |       | <b>2</b>           |       |
|----------------------|-------|--------------------|-------|
| C(13)–H(13)···F(6)   | 2.763 | C(17)–H(17)···F(2) | 2.817 |
| C(15)–H(15)···F(4)   | 2.775 | C(2)–H(2)···F(3)   | 2.420 |
| C(4)–H(4)···F(4)     | 2.750 | C(4)–H(4)···F(4)   | 2.721 |
| C(5)–H(5)···F(3)     | 2.719 | C(13)–H(13)···F(5) | 2.710 |
| C(18)–H(18)···F(3)   | 2.840 | C(9)–H(9)···F(3)   | 2.790 |
| C(21)–H(21)···F(1)   | 2.791 | C(9)–H(9)···F(1)   | 3.786 |
| C(5)–H(5)···F(1)     | 2.589 | C(9)–H(9)···F(2)   | 2.607 |
| C(5)–H(5)···F(2)     | 2.819 | C(17)–H(17)···F(2) | 2.817 |
| C(20)–H(20)···F(1)   | 2.710 | C(16)–H(16)···F(3) | 2.601 |
| C(16)–H(16)···F(5)   | 2.583 | C(15)–H(15)···F(4) | 2.819 |
| C(2)–H(2)···F(5)     | 2.417 | C(5)–H(5)···F(1)   | 2.607 |
| C(9)–H(9)···F(3)     | 2.610 | C(5)–H(5)···F(2)   | 2.693 |
| C(10A)–H(10A)···F(1) | 2.825 | C(5)–H(5)···F(6)   | 2.861 |
| C(9)–H(9)···F(5)     | 2.770 | C(19)–H(19)···F(1) | 2.846 |
|                      |       | C(20)–H(20)···F(6) | 2.764 |
| <b>3</b>             |       | <b>4</b>           |       |
| C(16)–H(16)···F(1)   | 2.693 | C(20)–H(20)···F(6) | 2.729 |
| C(19)–H(19)···F(5)   | 2.770 | C(21)–H(21)···F(6) | 2.798 |
| C(20)–H(20)···F(6)   | 2.815 | C(21)–H(21)···F(1) | 2.673 |
| C(21)–H(21)···F(6)   | 2.736 | C(1)–H(1)···F(1)   | 2.769 |
| C(14)–H(14)···F(4)   | 2.703 | C(1)–H(1)···F(5)   | 2.687 |
| C(21)–H(21)···F(2)   | 2.616 | C(19)–H(19)···F(5) | 2.823 |
| C(18)–H(18)···F(2)   | 2.482 | C(19)–H(19)···F(3) | 2.750 |
| C(2)–H(2)···F(1)     | 2.469 | C(14)–H(14)···F(5) | 2.816 |
| C(10B)–H(10B)···F(1) | 2.812 | C(4)–H(4)···F(4)   | 2.505 |
| C(9)–H(9)···F(1)     | 2.540 | C(12)–H(12)···F(4) | 2.606 |
| C(9)–H(9)···F(3)     | 2.665 | C(12)–H(12)···F(3) | 2.826 |
| C(16)–H(16)···F(2)   | 2.705 | C(13)–H(13)···F(3) | 2.818 |
| C(15)–H(15)···F(2)   | 2.610 |                    |       |
| C(5)–H(5)···F(3)     | 2.669 |                    |       |
| C(20)–H(20)···F(5)   | 2.791 |                    |       |
| C(20)–H(20)···F(4)   | 2.696 |                    |       |
| C(5)–H(5)···F(4)     | 2.748 |                    |       |
| C(21)–H(21)···F(4)   | 2.741 |                    |       |

**Table S4** Comparison of Selected Bond Lengths (Å) and Angles (°) of **1–4**  
Determined Experimentally and Optimized by DFT

| <b>1</b>    |                                |                            | <b>2</b>     |                                |                            |
|-------------|--------------------------------|----------------------------|--------------|--------------------------------|----------------------------|
|             | <b>Bond length /<br/>Angle</b> | <b>optimized<br/>value</b> |              | <b>Bond length /<br/>Angle</b> | <b>optimized<br/>value</b> |
| N(1)—Ru(1)  | 2.091(9)                       | 2.102                      | Ru(1)—N(1)   | 2.100(6)                       | 2.098                      |
| S(1)—Ru(1)  | 2.391(3)                       | 2.429                      | Ru(1)—S(1)   | 2.386(19)                      | 2.431                      |
| Cl(1)—Ru(1) | 2.394(3)                       | 2.421                      | Ru(1)—Cl(1)  | 2.399(2)                       | 2.416                      |
| C —Ru(1)    | 1.675(1)                       | 1.735                      | C —Ru(1)     | 1.679(1)                       | 1.759                      |
| N1—Ru1—S1   | 80.4(3)                        | 80.25                      | N1—Ru1—S1    | 80.55(16)                      | 80.32                      |
| N1—Ru1—Cl1  | 87.2(2)                        | 84.15                      | N1—Ru1—Cl1   | 87.14(16)                      | 84.40                      |
| S1—Ru1—Cl1  | 81.09(10)                      | 81.77                      | Cl(1)—Ru1—S1 | 80.85(7)                       | 81.53                      |
| <b>3</b>    |                                |                            | <b>4</b>     |                                |                            |
| N(1)—Ru(1)  | 2.092(2)                       | 2.105                      | Ru(1)—N(2)   | 2.096(7)                       | 2.102                      |
| Ru(1)—Se(1) | 2.5007(4)                      | 2.523                      | Ru(1)—Cl(1)  | 2.419(3)                       | 2.419                      |
| Cl(1)—Ru(1) | 2.4032(7)                      | 2.419                      | Ru(1)—Se(1)  | 2.526(19)                      | 2.523                      |
| C —Ru(1)    | 1.666                          | 1.738                      | C —Ru1       | 1.687                          | 1.737                      |
| N1—Ru1—Se1  | 81.03(6)                       | 81.25                      | N1—Ru1—Se1   | 81.5(3)                        | 81.40                      |
| N1—Ru1—Cl1  | 88.93(6)                       | 84.46                      | N1—Ru1—Cl1   | 88.2(2)                        | 84.34                      |
| Se1—Ru1—Cl1 | 81.03(6)                       | 80.25                      | Cl1—Ru1—Se1  | 78.40(9)                       | 80.13                      |

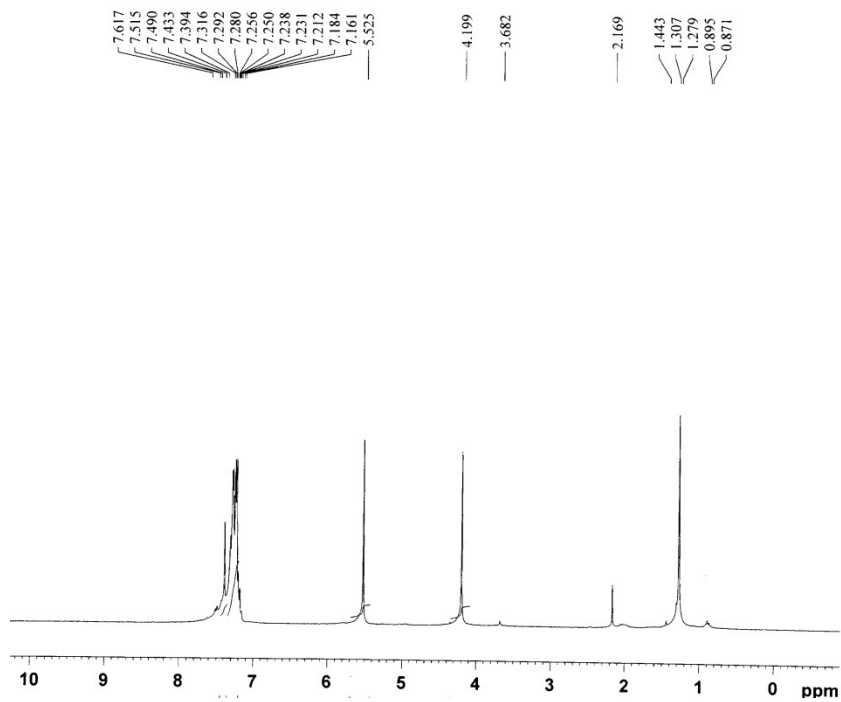

Figure S3 <sup>1</sup>H NMR spectrum of L1

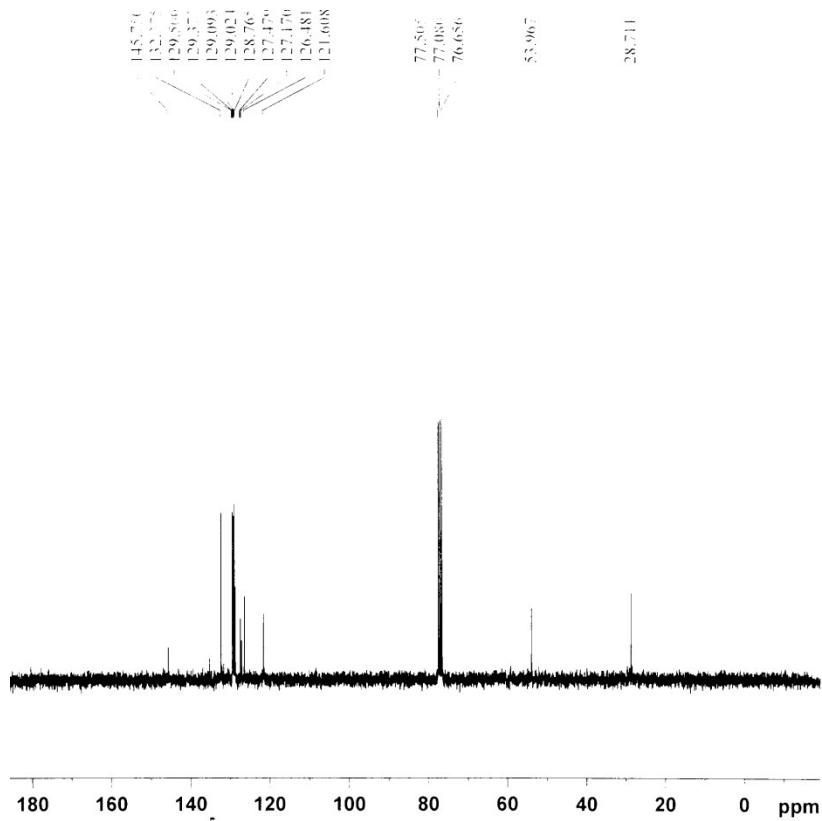

Figure S4 <sup>13</sup>C{<sup>1</sup>H} NMR spectrum of L1



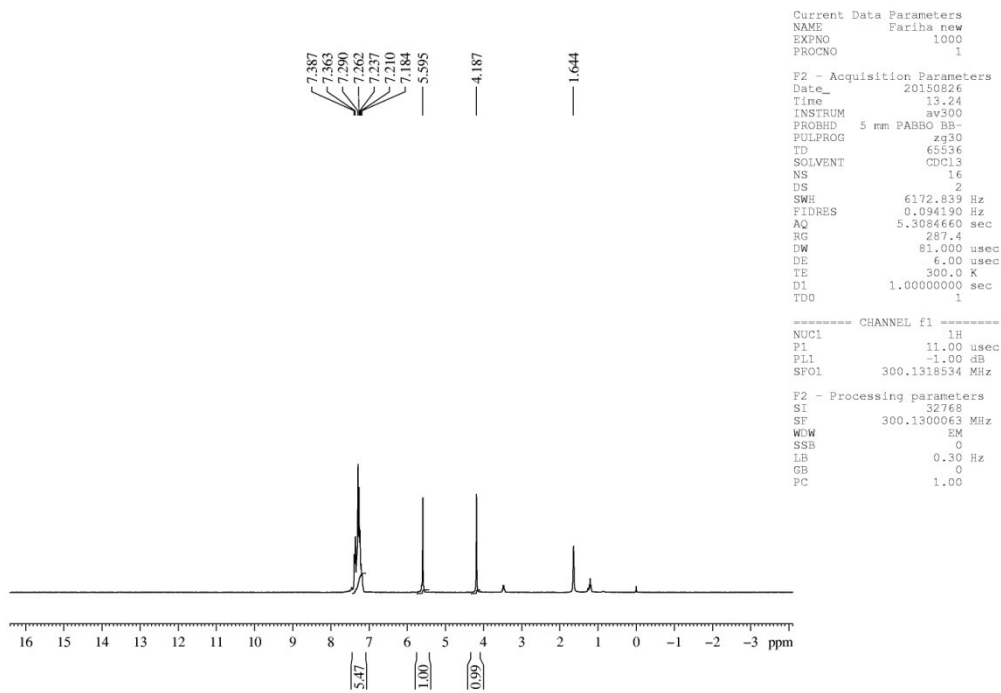

Figure S5  $^1\text{H}$  NMR spectrum of L2

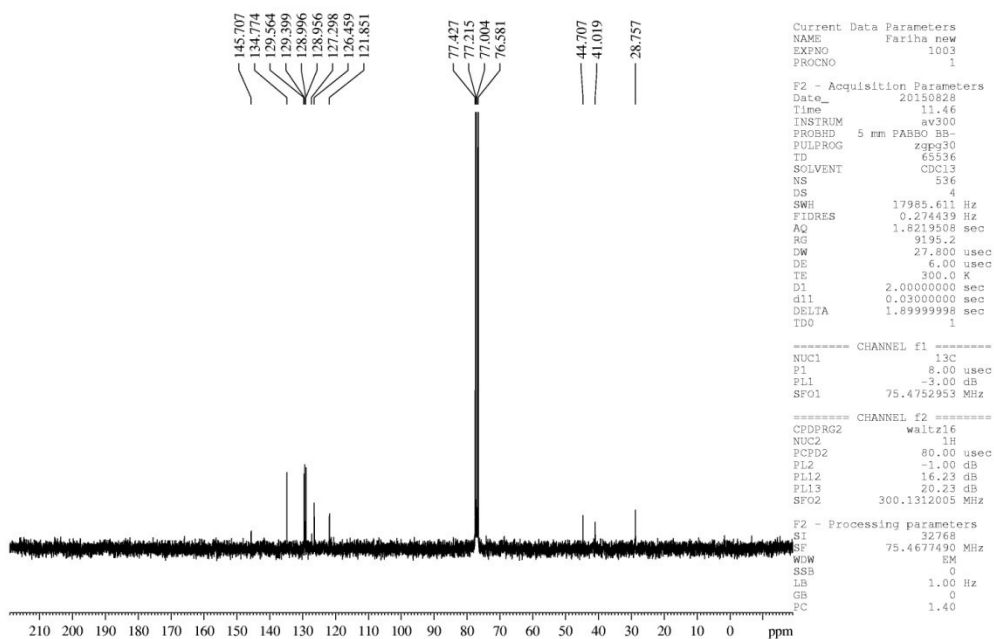

Figure S6  $^{13}\text{C}\{^1\text{H}\}$  NMR spectrum of L2

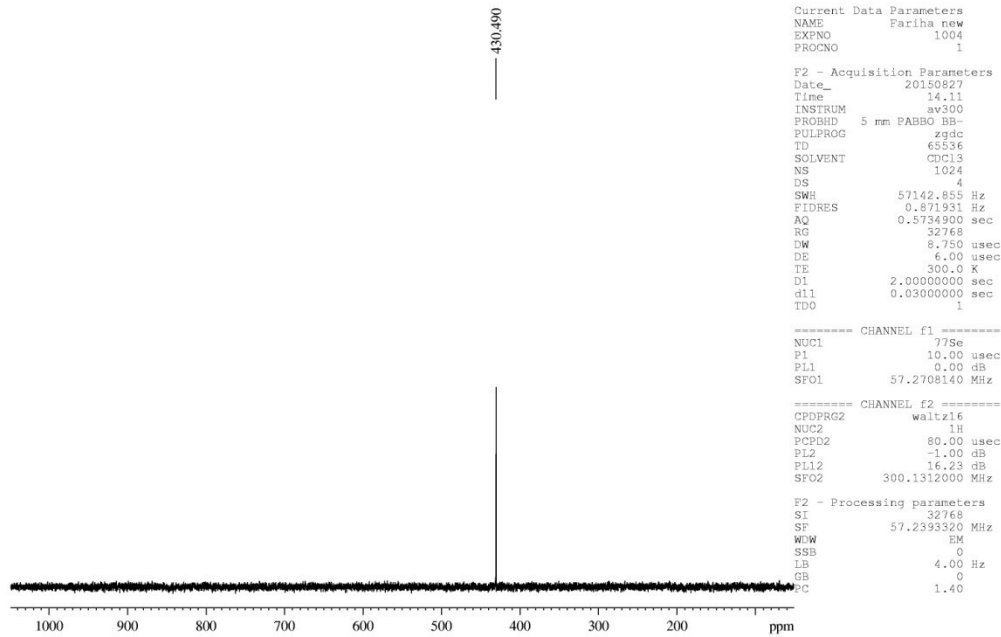

Figure S7 <sup>77</sup>Se NMR spectrum of L2

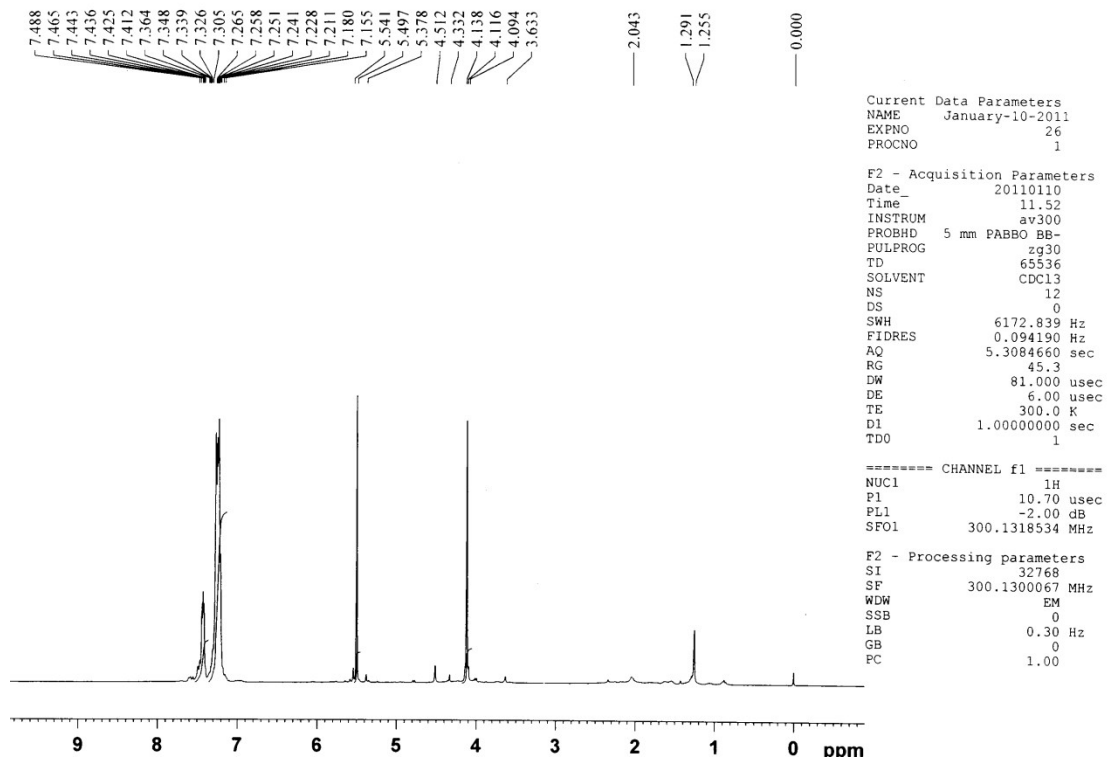

Figure S8 <sup>1</sup>H NMR spectrum of L3

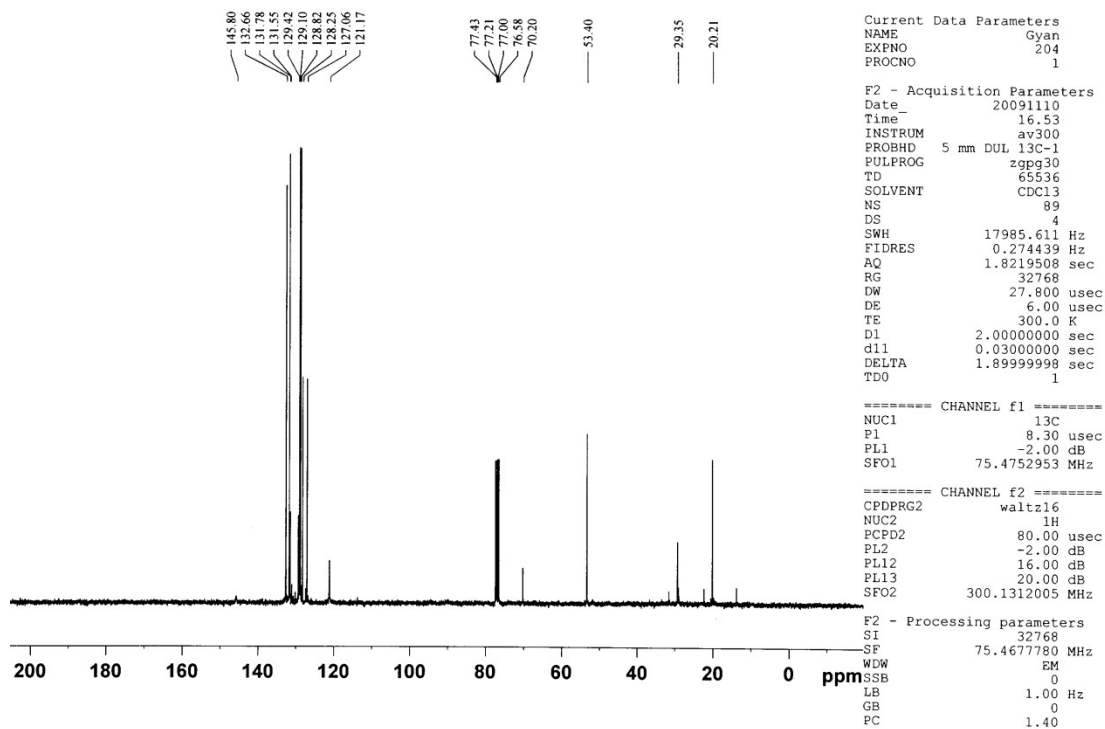

Figure S9  $^{13}\text{C}\{^1\text{H}\}$  NMR spectrum of L3

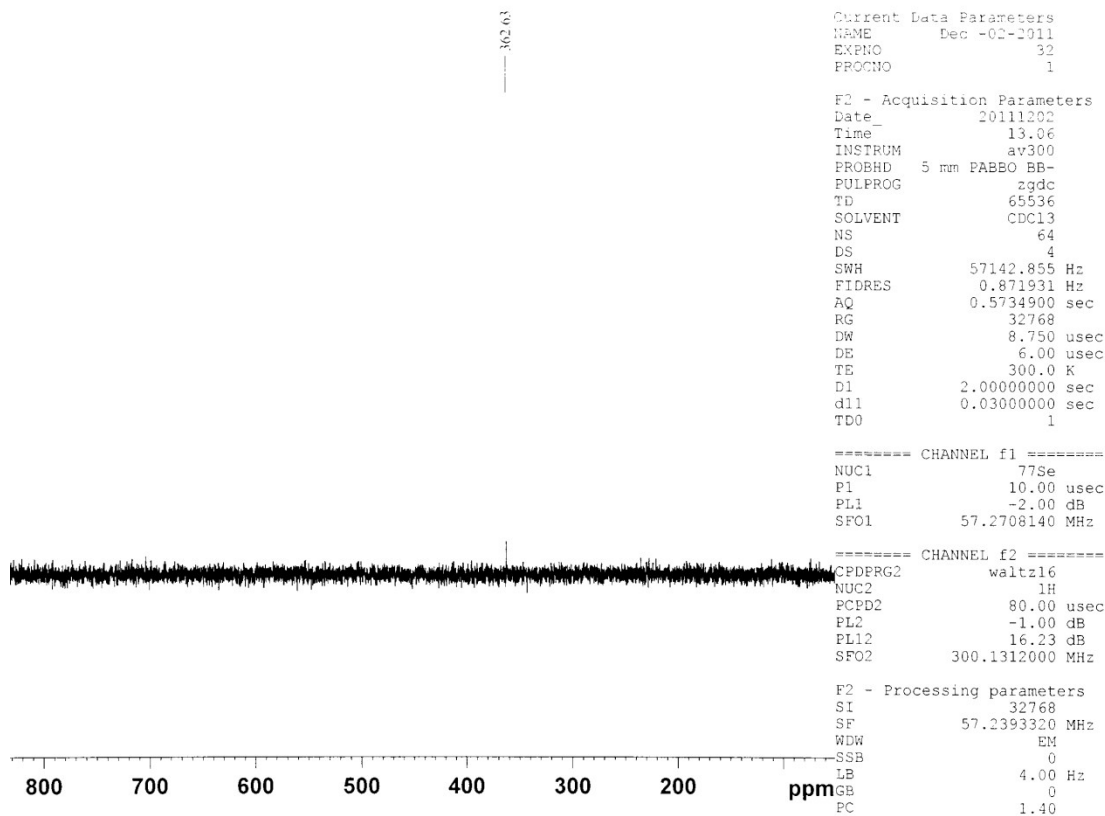

Figure S10  $^{77}\text{Se}$  NMR spectrum of L3

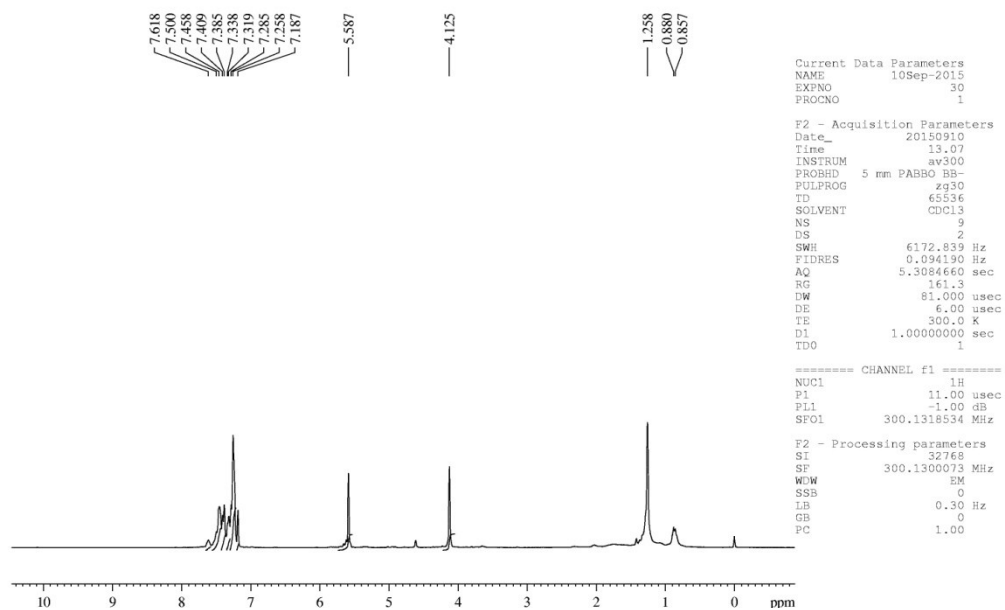

Figure S11  $^{13}\text{C}\{^1\text{H}\}$  NMR spectrum of L4

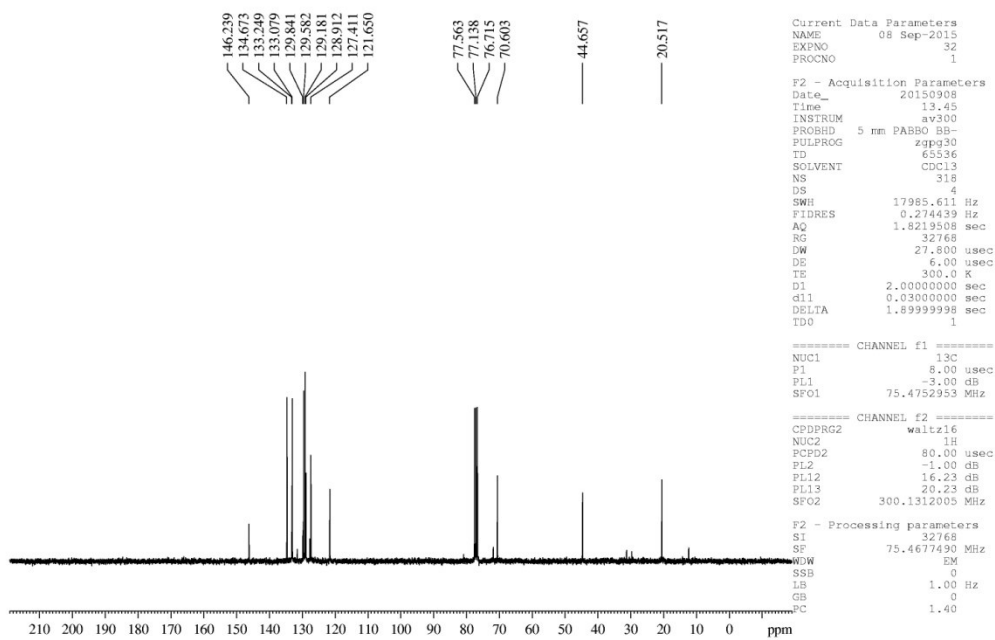

Figure S12  $^{13}\text{C}\{^1\text{H}\}$  NMR spectrum of L4

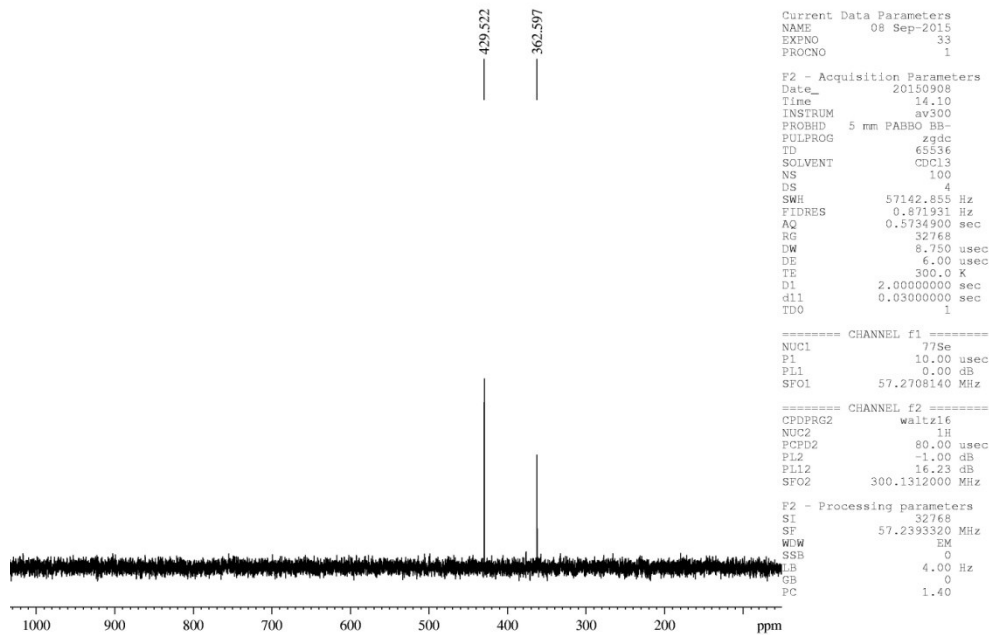

Figure S13 <sup>77</sup>Se NMR spectrum of L4

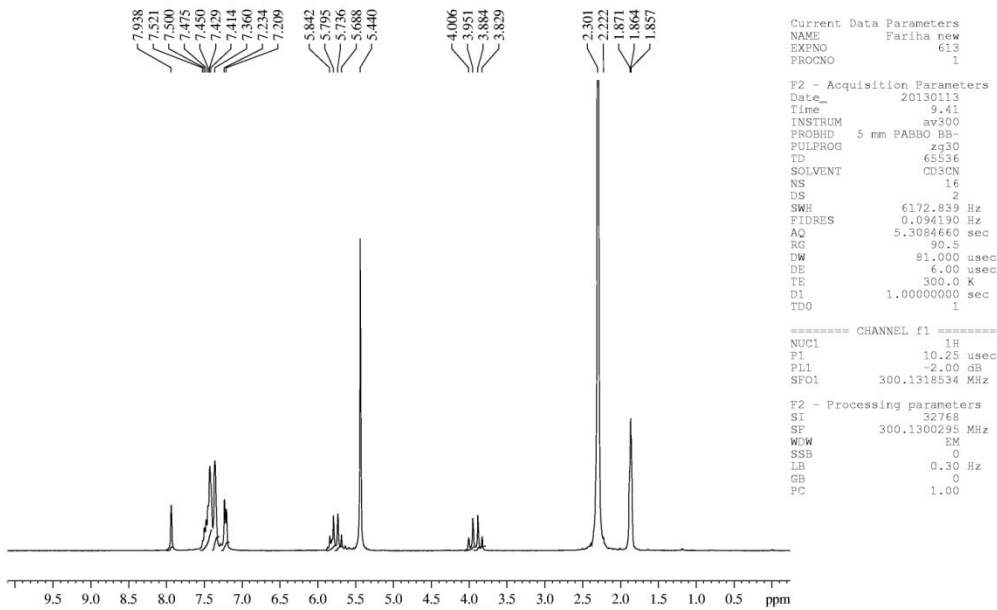

Figure S14 <sup>1</sup>H NMR spectrum of 1

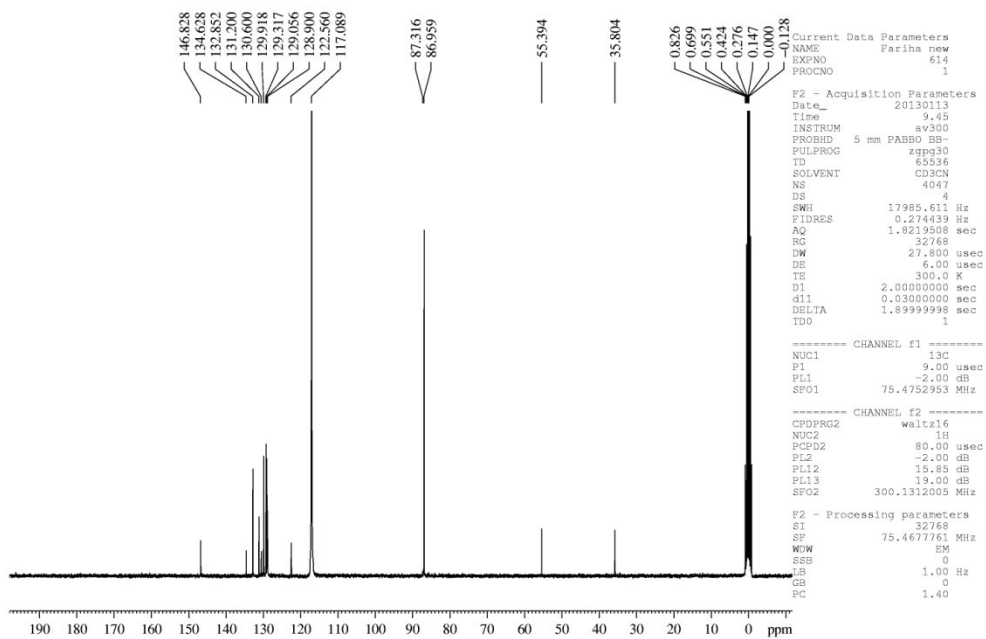

Figure S15  $^{13}\text{C}\{^1\text{H}\}$  NMR spectrum of 1

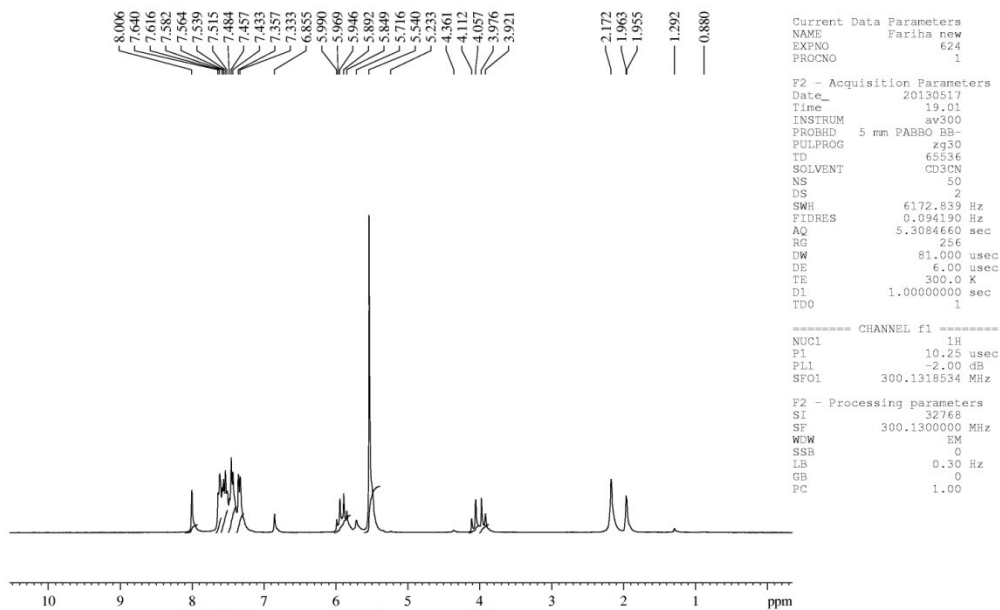

Figure S16  $^1\text{H}$  NMR spectrum of 2

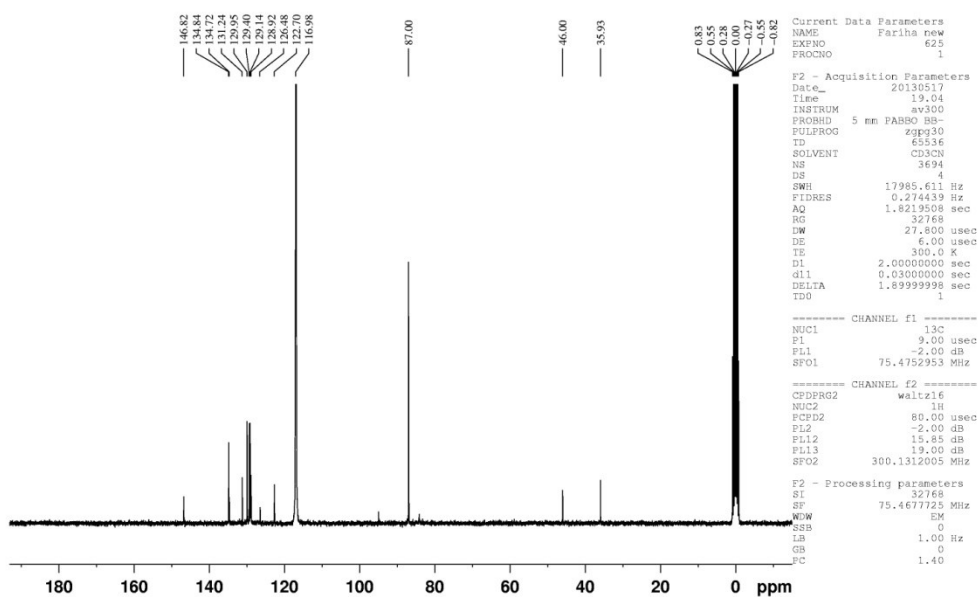

Figure S17  $^{13}\text{C}\{^1\text{H}\}$  NMR spectrum of 2

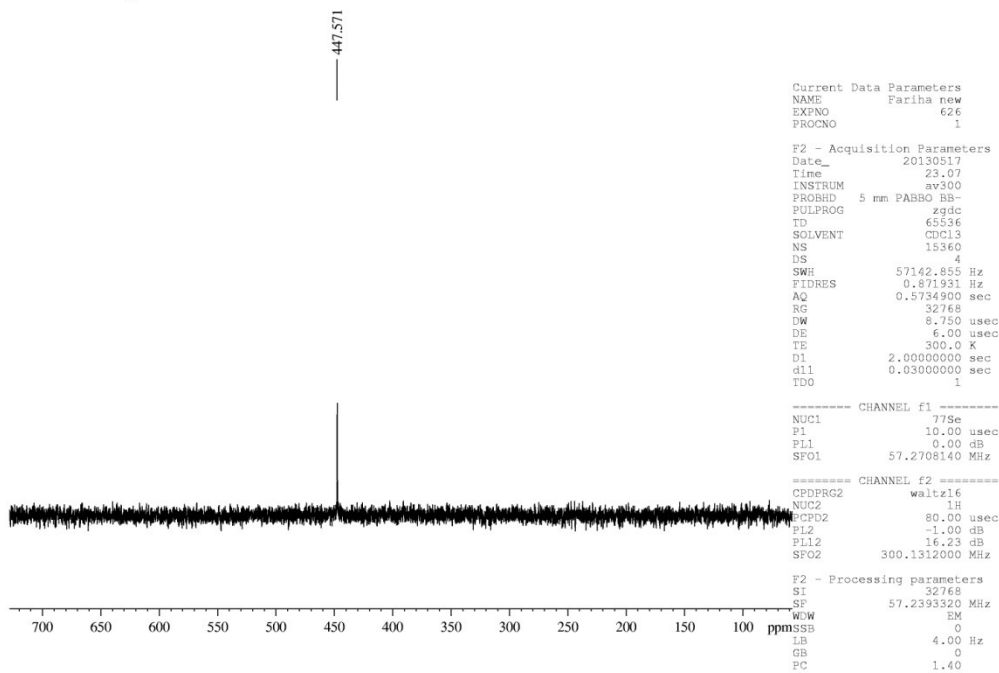

Figure S18  $^{77}\text{Se}$  NMR spectrum of 2

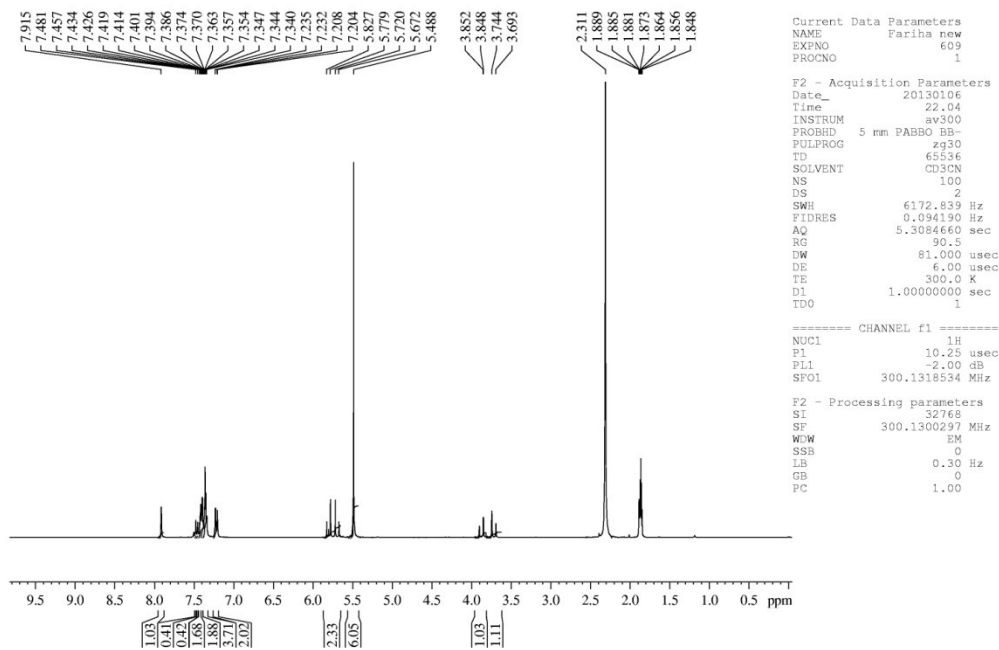

Figure S19  $^1\text{H}$  NMR spectrum of **3**

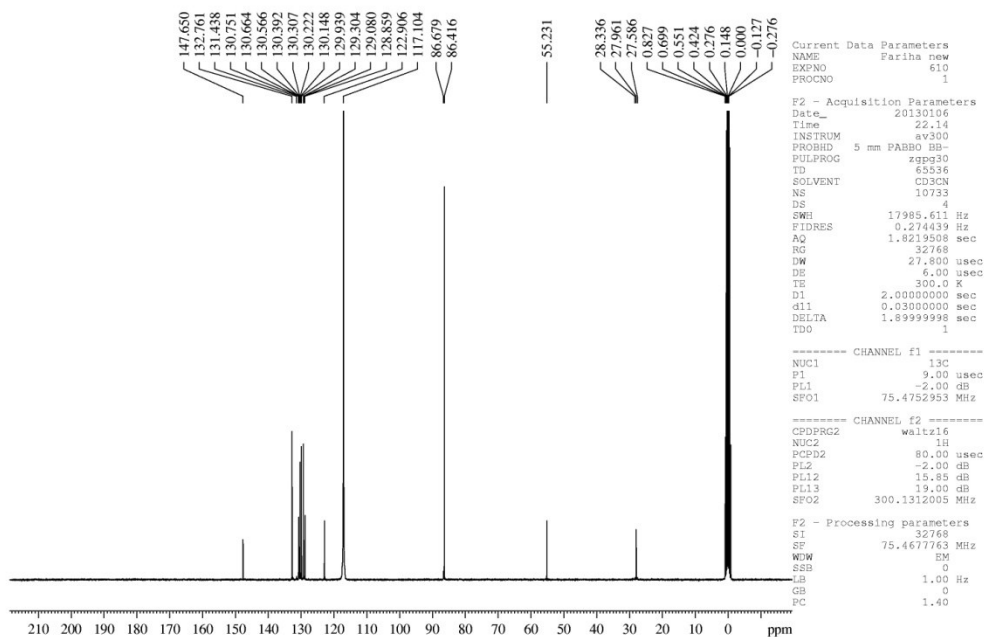

Figure S20  $^{13}\text{C}\{^1\text{H}\}$  NMR spectrum of **3**



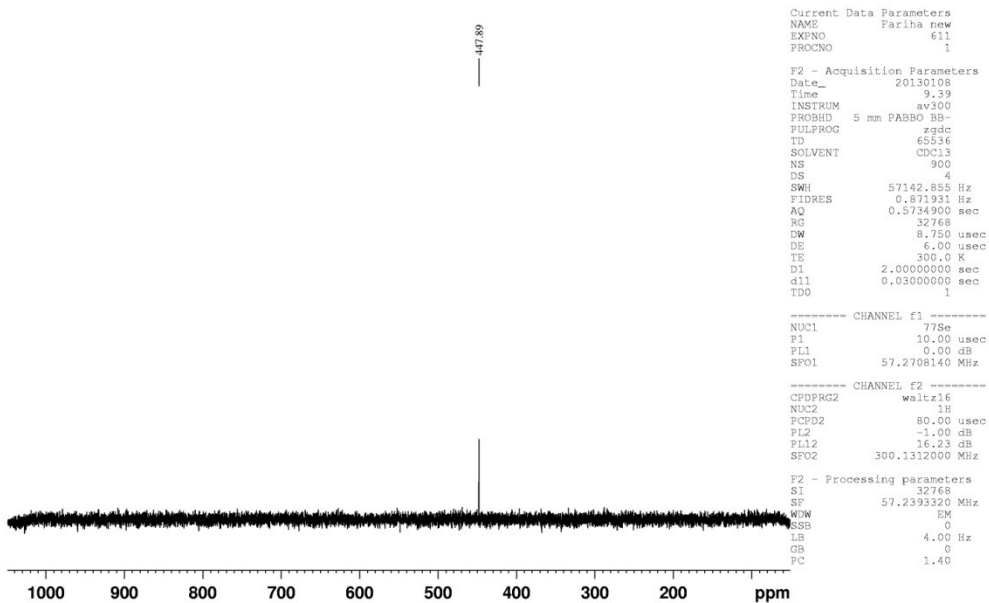

Figure S21 <sup>77</sup>Se NMR spectrum of 3

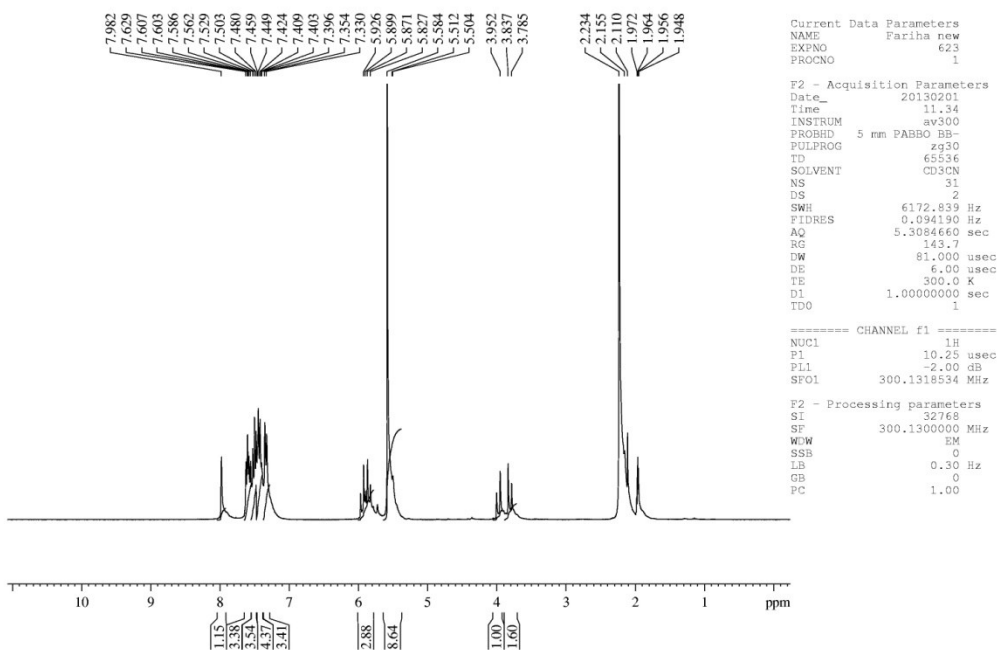

Figure S22 <sup>1</sup>H NMR spectrum of 4

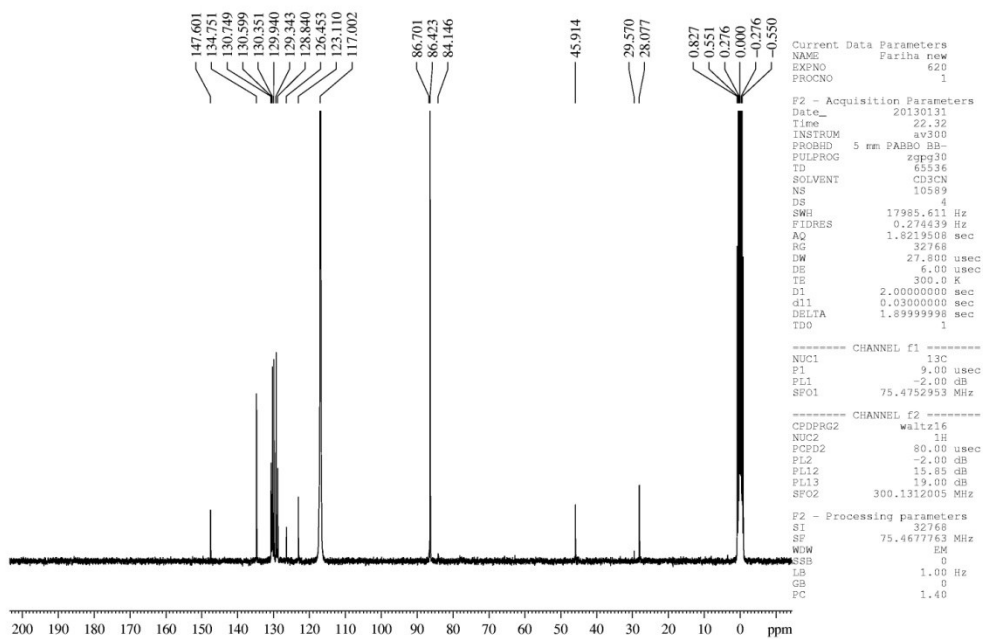

Figure S23  $^{13}\text{C}\{^1\text{H}\}$  NMR spectrum of 4

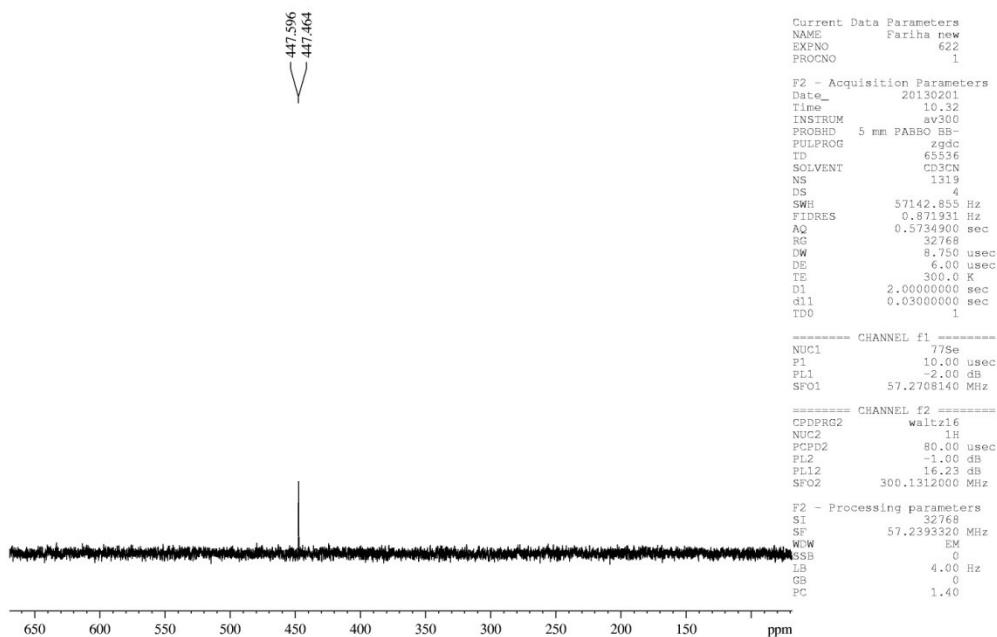

Figure S24  $^{77}\text{Se}$  NMR spectrum of 4

## Mass Spectrum SmartFormula Report

Analysis Info Acquisition Date 11/6/2012 10:17:52 AM  
Analysis Name D:\Data\NOV\_12\1.d Operator Sharma/Singh  
Method tune\_low.m Instrument / Ser# micrOTOF-Q II 10262  
Sample Name TM 1:100  
Comment

Acquisition Parameter  
Source Type ESI Ion Polarity Positive Set Nebulizer 0.3 Bar  
Focus Not active Set Capillary 4500 V Set Dry Heater 180 °C  
Scan Begin 50 m/z Set End Plate Offset -500 V Set Dry Gas 4.0 l/min  
Scan End 1500 m/z Set Collision Cell RF 100.0 Vpp Set Divert Valve Source

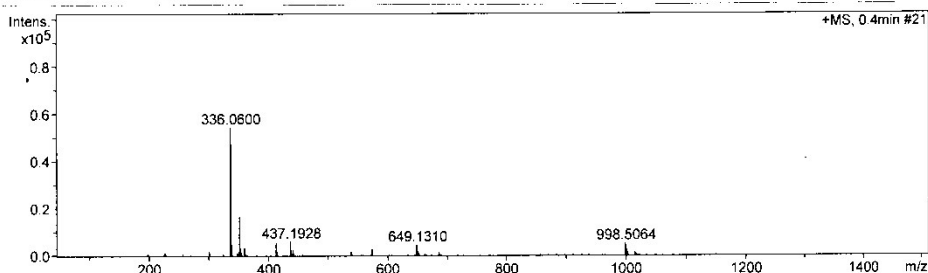

| Meas. m/z | # | Formula              | Score  | m/z      | err [mDa] | err [ppm] | mSigma | rdb  | e <sup>-</sup> Conf | N-Rule |
|-----------|---|----------------------|--------|----------|-----------|-----------|--------|------|---------------------|--------|
| 336.0600  | 1 | C 16 H 15 N 3 Na S 2 | 100.00 | 336.0600 | -0.0      | -0.1      | 3.5    | 10.5 | even                | ok     |

Figure S25 Mass spectrum of L1

## Mass Spectrum SmartFormula Report

Analysis Info Acquisition Date 5/11/2012 10:52:57 AM  
Analysis Name D:\Data\MAY\_2012\1r2.d Operator Sharma/Singh  
Method tune\_low.m Instrument / Ser# micrOTOF-Q II 10262  
Sample Name  
Comment

Acquisition Parameter  
Source Type ESI Ion Polarity Positive Set Nebulizer 0.3 Bar  
Focus Not active Set Capillary 4500 V Set Dry Heater 180 °C  
Scan Begin 50 m/z Set End Plate Offset -500 V Set Dry Gas 4.0 l/min  
Scan End 1500 m/z Set Collision Cell RF 100.0 Vpp Set Divert Valve Source

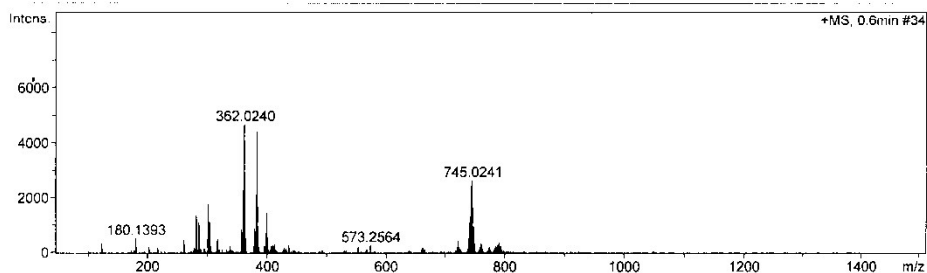

| Meas. m/z | # | Formula            | Score  | m/z      | err [mDa] | err [ppm] | mSigma | rdb  | e <sup>-</sup> Conf | N-Rule |
|-----------|---|--------------------|--------|----------|-----------|-----------|--------|------|---------------------|--------|
| 362.0240  | 1 | C 16 H 16 N 3 S Se | 100.00 | 362.0224 | -1.6      | -4.4      | 12.6   | 10.5 | even                | ok     |

Figure S26 Mass spectrum of L2

### Mass Spectrum SmartFormula Report

**Analysis Info**  
 Analysis Name: D:\Data\JAN\_2012\far-4.d  
 Method: tune\_wide.m  
 Sample Name:  
 Comment:  
 Acquisition Date: 1/17/2012 12:12:17 PM  
 Operator: Sharma/Singh  
 Instrument / Ser#: micrOTOF-Q II 10262

**Acquisition Parameter**  
 Source Type: ESI  
 Focus: Active  
 Scan Begin: 50 m/z  
 Scan End: 3000 m/z  
 Ion Polarity: Positive  
 Set Capillary: 4500 V  
 Set End Plate Offset: -500 V  
 Set Collision Cell RF: 600.0 Vpp  
 Set Nebulizer: 0.3 Bar  
 Set Dry Heater: 180 °C  
 Set Dry Gas: 4.0 l/min  
 Set Divert Valve: Source

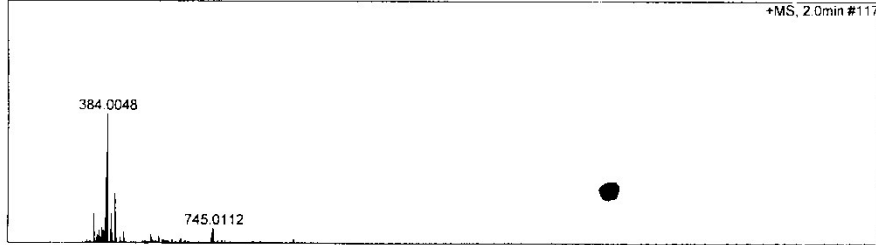

| Meas. #  | m/z | Formula                                                            | m/z      | err [ppm] | Me an err [ppm] | rd   | N-R | e <sup>-</sup> Conf | mSigma | Std  | Std | Std  | Std | Std   |
|----------|-----|--------------------------------------------------------------------|----------|-----------|-----------------|------|-----|---------------------|--------|------|-----|------|-----|-------|
| 384.0048 | 1   | C <sub>16</sub> H <sub>15</sub> N <sub>3</sub> NaS <sub>2</sub> Se | 384.0044 | -1.2      | 0.3             | 10.5 | ok  | even                | 37.7   | 52.4 | 0.6 | 16.2 | 0.9 | 842.7 |

Figure S27 Mass spectrum of L3

### Mass Spectrum SmartFormula Report

**Analysis Info**  
 Analysis Name: D:\Data\Service\fr1.d  
 Method: tune\_low.m  
 Sample Name:  
 Comment:  
 Acquisition Date: 5/11/2012 10:31:59 AM  
 Operator: Sharma/Singh  
 Instrument / Ser#: micrOTOF-Q II 10262

**Acquisition Parameter**  
 Source Type: ESI  
 Focus: Not active  
 Scan Begin: 50 m/z  
 Scan End: 1500 m/z  
 Ion Polarity: Positive  
 Set Capillary: 4500 V  
 Set End Plate Offset: -500 V  
 Set Collision Cell RF: 100.0 Vpp  
 Set Nebulizer: 0.3 Bar  
 Set Dry Heater: 180 °C  
 Set Dry Gas: 4.0 l/min  
 Set Divert Valve: Source

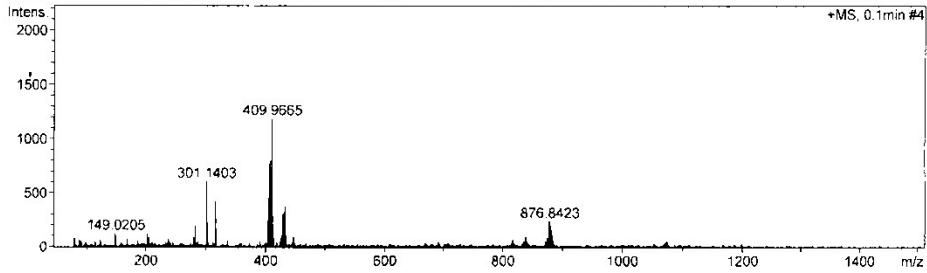

| Meas. #  | m/z | Formula                                                        | Score  | m/z      | err [mDa] | err [ppm] | mSigma | rd   | e <sup>-</sup> Conf | N-Rule |
|----------|-----|----------------------------------------------------------------|--------|----------|-----------|-----------|--------|------|---------------------|--------|
| 409.9655 | 1   | C <sub>16</sub> H <sub>16</sub> N <sub>3</sub> Se <sub>2</sub> | 100.00 | 409.9672 | 0.7       | 1.6       | 78.6   | 10.5 | even                | ok     |

Figure S28 Mass spectrum of L4

## Mass Spectrum SmartFormula Report

|                      |                      |                   |                        |
|----------------------|----------------------|-------------------|------------------------|
| <b>Analysis Info</b> |                      | Acquisition Date  | 11/21/2012 10:22:07 AM |
| Analysis Name        | D:\Data\NOV_12\F 1.d | Operator          | Sharma/Singh           |
| Method               | tune_low.m           | Instrument / Ser# | micrOTOF-Q II 10262    |
| Sample Name          | TM 1:100             |                   |                        |
| Comment              |                      |                   |                        |

|                              |            |                       |           |                  |           |
|------------------------------|------------|-----------------------|-----------|------------------|-----------|
| <b>Acquisition Parameter</b> |            |                       |           |                  |           |
| Source Type                  | ESI        | Ion Polarity          | Positive  | Set Nebulizer    | 0.3 Bar   |
| Focus                        | Not active | Set Capillary         | 4500 V    | Set Dry Heater   | 180 °C    |
| Scan Begin                   | 50 m/z     | Set End Plate Offset  | -500 V    | Set Dry Gas      | 4.0 l/min |
| Scan End                     | 1500 m/z   | Set Collision Cell RF | 100.0 Vpp | Set Divert Valve | Source    |

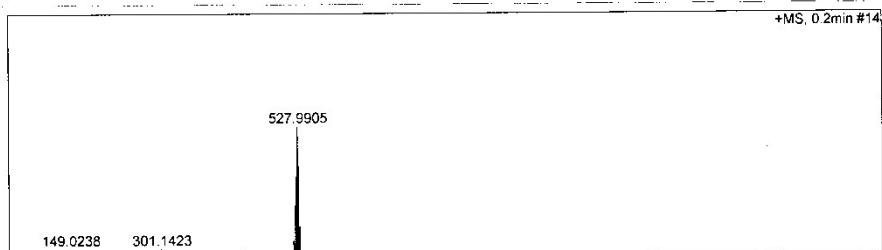

| Meas. m/z | # | Formula                                                           | Score  | m/z      | err [mDa] | err [ppm] | mSigma | rdb  | e <sup>-</sup> Conf | N-Rule |
|-----------|---|-------------------------------------------------------------------|--------|----------|-----------|-----------|--------|------|---------------------|--------|
| 527.9905  | 1 | C <sub>22</sub> H <sub>21</sub> ClN <sub>3</sub> RuS <sub>2</sub> | 100.00 | 527.9905 | -0.0      | -0.0      | 8.6    | 14.0 | odd                 | -      |

**Figure S29** Mass spectrum of 1

## Mass Spectrum SmartFormula Report

|                      |                        |                   |                       |
|----------------------|------------------------|-------------------|-----------------------|
| <b>Analysis Info</b> |                        | Acquisition Date  | 5/11/2012 11:39:37 AM |
| Analysis Name        | D:\Data\MAY_2012\fr3.d | Operator          | Sharma/Singh          |
| Method               | tune_low.m             | Instrument / Ser# | micrOTOF-Q II 10262   |
| Sample Name          |                        |                   |                       |
| Comment              |                        |                   |                       |

|                              |            |                       |           |                  |           |
|------------------------------|------------|-----------------------|-----------|------------------|-----------|
| <b>Acquisition Parameter</b> |            |                       |           |                  |           |
| Source Type                  | ESI        | Ion Polarity          | Positive  | Set Nebulizer    | 0.3 Bar   |
| Focus                        | Not active | Set Capillary         | 4500 V    | Set Dry Heater   | 180 °C    |
| Scan Begin                   | 50 m/z     | Set End Plate Offset  | -500 V    | Set Dry Gas      | 4.0 l/min |
| Scan End                     | 1500 m/z   | Set Collision Cell RF | 100.0 Vpp | Set Divert Valve | Source    |

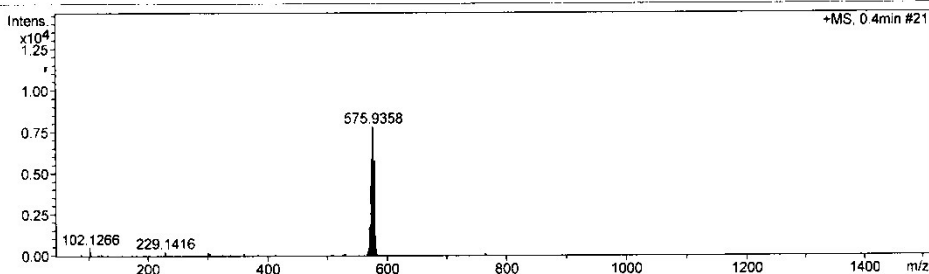

| Meas. m/z | # | Formula                                                              | Score  | m/z      | err [mDa] | err [ppm] | mSigma | rdb  | e <sup>-</sup> Conf | N-Rule |
|-----------|---|----------------------------------------------------------------------|--------|----------|-----------|-----------|--------|------|---------------------|--------|
| 575.9358  | 1 | C <sub>22</sub> H <sub>21</sub> ClN <sub>3</sub> RuS <sub>2</sub> Se | 100.00 | 575.9352 | -0.6      | -1.0      | 15.2   | 14.0 | odd                 | -      |

**Figure S30** Mass spectrum of 2

## Mass Spectrum SmartFormula Report

|                      |                           |                   |                       |
|----------------------|---------------------------|-------------------|-----------------------|
| <b>Analysis Info</b> |                           | Acquisition Date  | 3/30/2012 12:12:37 PM |
| Analysis Name        | D:\Data\March_12\sese-a.d | Operator          | Sharma/Singh          |
| Method               | tune_low.m                | Instrument / Ser# | micrOTOF-Q II 10262   |
| Sample Name          |                           |                   |                       |
| Comment              |                           |                   |                       |

|                              |            |                       |           |                  |           |
|------------------------------|------------|-----------------------|-----------|------------------|-----------|
| <b>Acquisition Parameter</b> |            |                       |           |                  |           |
| Source Type                  | ESI        | Ion Polarity          | Positive  | Set Nebulizer    | 0.3 Bar   |
| Focus                        | Not active | Set Capillary         | 4500 V    | Set Dry Heater   | 180 °C    |
| Scan Begin                   | 50 m/z     | Set End Plate Offset  | -500 V    | Set Dry Gas      | 4.0 l/min |
| Scan End                     | 1500 m/z   | Set Collision Cell RF | 100.0 Vpp | Set Divert Valve | Source    |

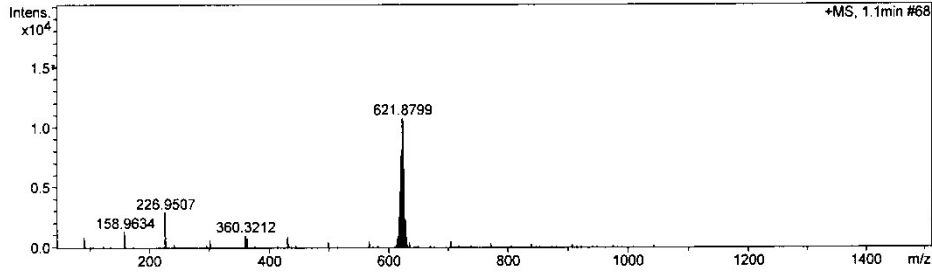

| Meas. m/z | # | Formula                  | Score  | m/z      | err [mDa] | err [ppm] | mSig ma | rdb  | e <sup>-</sup> Conf | N-Rule |
|-----------|---|--------------------------|--------|----------|-----------|-----------|---------|------|---------------------|--------|
| 623.8793  | 1 | C 22 H 21 Cl N 3 Ru Se 2 | 100.00 | 623.8800 | 0.8       | 1.2       | 12.1    | 14.0 | odd                 | -      |

**Figure S31 Mass spectrum of 3**

## Mass Spectrum SmartFormula Report

|                      |                      |                   |                       |
|----------------------|----------------------|-------------------|-----------------------|
| <b>Analysis Info</b> |                      | Acquisition Date  | 3/16/2012 11:11:01 AM |
| Analysis Name        | D:\Data\March_12\3.d | Operator          | Sharma/Singh          |
| Method               | tune_low.m           | Instrument / Ser# | micrOTOF-Q II 10262   |
| Sample Name          |                      |                   |                       |
| Comment              |                      |                   |                       |

|                              |            |                       |           |                  |           |
|------------------------------|------------|-----------------------|-----------|------------------|-----------|
| <b>Acquisition Parameter</b> |            |                       |           |                  |           |
| Source Type                  | ESI        | Ion Polarity          | Positive  | Set Nebulizer    | 0.3 Bar   |
| Focus                        | Not active | Set Capillary         | 4500 V    | Set Dry Heater   | 180 °C    |
| Scan Begin                   | 50 m/z     | Set End Plate Offset  | -500 V    | Set Dry Gas      | 4.0 l/min |
| Scan End                     | 1500 m/z   | Set Collision Cell RF | 100.0 Vpp | Set Divert Valve | Source    |

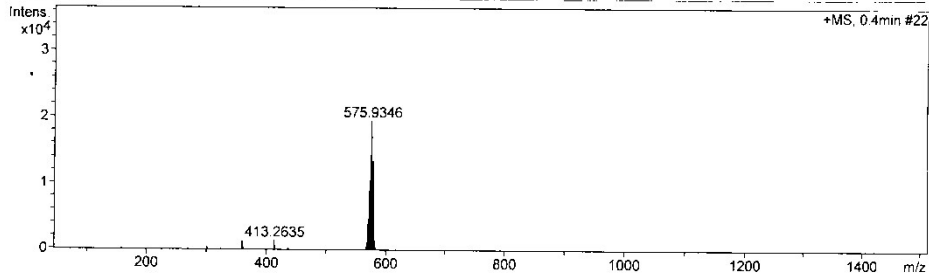

| Meas. m/z | # | Formula                  | Score  | m/z      | err [mDa] | err [ppm] | mSig ma | rdb  | e <sup>-</sup> Conf | N-Rule |
|-----------|---|--------------------------|--------|----------|-----------|-----------|---------|------|---------------------|--------|
| 575.9346  | 1 | C 22 H 21 Cl N 3 Ru S Se | 100.00 | 575.9352 | 0.6       | 1.0       | 13.4    | 14.0 | odd                 | -      |

**Figure S32 Mass spectrum of 4**

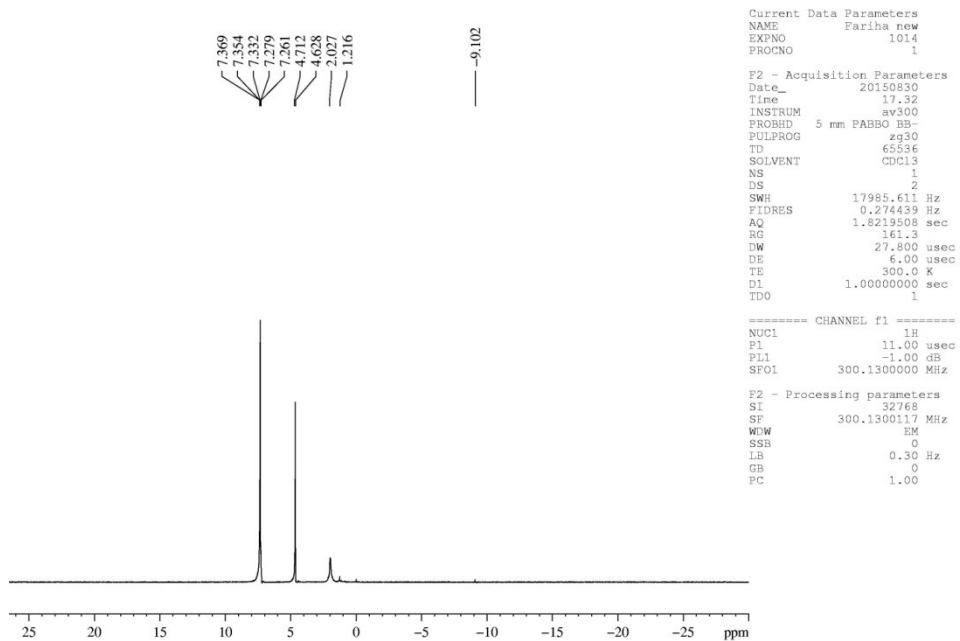

**Figure S33**  $^1\text{H}$ NMR spectrum of Oppenauer-type oxidation of benzyl alcohol showing M-H bond

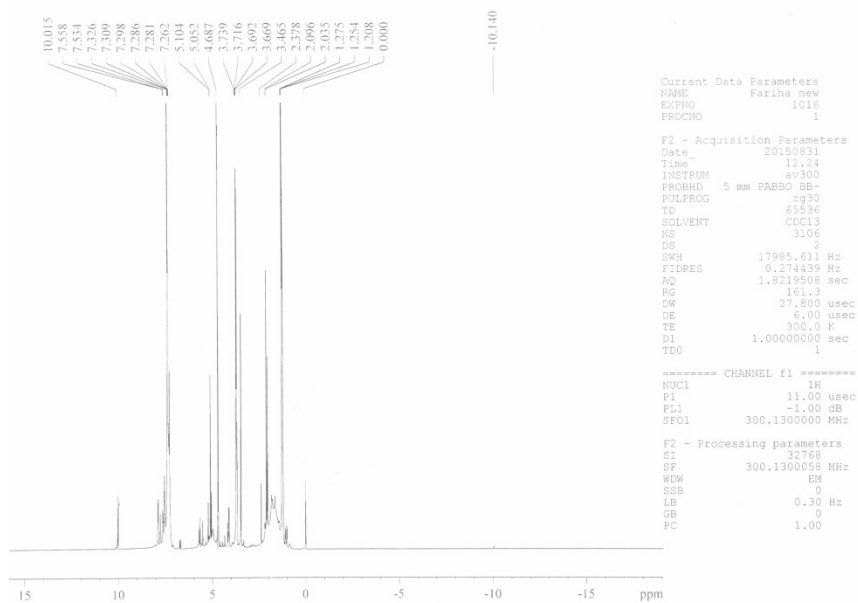

**Figure S34**  $^1\text{H}$ NMR spectrum of TH of Benzaldehyde showing M-H bond
